# Supplementary material for: Combining Pd(π-allyl)Cp and PPh3 as a unique catalyst for efficient synthesis of alkyliodo indoles via C(sp3)–I reductive elimination
Source: Royal Society of Chemistry journal article supplement (doi:10.1039/c5qo00197h), 2015-01-01
Supplement: c5qo00197h1.pdf [file c5qo00197h1.pdf]

***Cover Page for Supporting Information***

***Manuscript Title:***

Combining Pd( $\pi$ -allyl)Cp and PPh<sub>3</sub> as a unique Catalyst for Efficient Synthesis of Alkylido Indoles via C(sp<sup>3</sup>)-I Reductive Elimination

***Authors:***

Wei Hao, Han Wang, Patrick J. Walsh,\* and Zhenfeng Xi\*

***Contents:***

|                                                                                     |               |
|-------------------------------------------------------------------------------------|---------------|
| <b>1) Experimental Details and Characterization Data</b>                            | <b>S2–S5</b>  |
| <b>2) References</b>                                                                | <b>S5</b>     |
| <b>3) Scanned <sup>1</sup>H NMR and <sup>13</sup>C NMR Spectra of All Compounds</b> | <b>S5-S12</b> |

## 1) Experimental Details and Characterization Data

### General Information

Unless otherwise noted, all starting materials were commercially available and were used without further purification. Solvents were purified by a Mbraun SPS-800 Solvent Purification System. *n*BuLi, palladium catalyst and phosphine ligand was obtained from Aldrich, TCI, Alfa, Acros, Adamas-beta, J&K and others. All reactions were carried out under a dry and oxygen-free nitrogen atmosphere in slight positive pressure by using Schlenk techniques, unless otherwise noted.

<sup>1</sup>H and <sup>13</sup>C NMR spectra were recorded on a Bruker ARX400 spectrometer (FT, 400 MHz for <sup>1</sup>H; 100 MHz for <sup>13</sup>C) or Bruker ARX500 spectrometer (FT, 500 MHz for <sup>1</sup>H, 125 MHz for <sup>13</sup>C, 202 MHz for <sup>31</sup>P) at room temperature, unless otherwise noted. For <sup>31</sup>P NMR, chemical shifts are referenced to 85% H<sub>3</sub>PO<sub>4</sub> as an external standard. High-resolution mass spectra (HRMS) were recorded on a Bruker Apex IV FTMS mass spectrometer using ESI (electrospray ionization). GC analyses were recorded on SHIMADZU GC-2010 spectrometer using FID.

### Procedures and Characterization Data

**Typical procedure for the preparation of 2:** Under an atmosphere of nitrogen, Pd( $\pi$ -allyl)(Cp) (5 mol %), PPh<sub>3</sub> (10 mol %) and LiO<sup>t</sup>Bu (0.36 mmol), were added in 2 mL cyclohexane. The reaction mixture was then stirred at room temperature for 5 min and **1** (0.3 mmol) and alkyne (0.36 mmol) were added under nitrogen. The reaction mixture was stirred at 130 °C for 12 h (aliphatic alkynes) or 48 h (aromatic alkynes). The reaction mixture was cooled to room temperature, quenched with water and extracted with Et<sub>2</sub>O. The combined organic layer was washed with brine and dried over MgSO<sub>4</sub>. The solvent was then evaporated in vacuo and the residue was purified by silica gel column chromatography with petroleum ether and ethyl acetate (10:1) as eluent to afford the final products. Products **2a-c** and **2e-f** are known compounds and their NMR spectra are in consistence with those in the literature.<sup>1</sup>

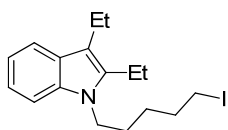

**2a<sup>1</sup>**: Yellow oil, isolated yield 90% (100 mg). <sup>1</sup>H NMR (400 MHz, CDCl<sub>3</sub>, Me<sub>4</sub>Si): δ 1.19-1.25 (m, 6H, CH<sub>3</sub>), 1.44-1.52 (m, 2H, CH<sub>2</sub>), 1.73-1.87 (m, 4H, CH<sub>2</sub>), 2.70-2.79 (m, 4H, CH<sub>2</sub>), 3.16 (t, *J* = 6.9, 2H, CH<sub>2</sub>), 4.05 (t, *J* = 7.6 Hz, 2H, CH<sub>2</sub>), 7.06 (t, *J* = 7.4 Hz, 1H, CH), 7.13 (t, *J* = 7.5 Hz, 1H, CH), 7.24 (d, *J* = 8.8 Hz, 1H, CH), 7.54 (d, *J* = 7.8 Hz, 1H, CH).

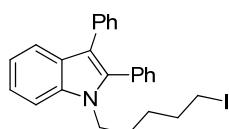

**2b<sup>1</sup>**: Yellow oil, isolated yield 72% (100 mg). <sup>1</sup>H NMR (400 MHz, CDCl<sub>3</sub>, Me<sub>4</sub>Si): δ 1.21-1.28 (m, 2H, CH<sub>2</sub>), 1.60-1.71 (m, 4H, CH<sub>2</sub>), 3.02 (t, *J* = 7.0 Hz, 2H, CH<sub>2</sub>), 4.10 (t, *J* = 7.5 Hz, 2H, CH<sub>2</sub>), 7.23-7.33 (m, 9H, CH), 7.38-7.40 (m, 4H, CH), 7.80 (d, *J* = 7.9 Hz, 1H, CH).

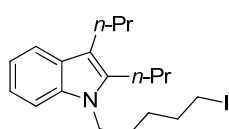

**2c<sup>1</sup>**: Yellow oil, isolated yield 88% (105 mg). <sup>1</sup>H NMR (400 MHz, CDCl<sub>3</sub>, Me<sub>4</sub>Si): δ 0.95-1.03 (m, 6H, CH<sub>3</sub>), 1.43-1.50 (m, 2H, CH<sub>2</sub>), 1.56-1.68 (m, 4H, CH<sub>2</sub>), 1.71-1.77 (m, 2H, CH<sub>2</sub>), 1.79-1.86 (m, 2H, CH<sub>2</sub>), 2.65-2.71 (m, 4H, CH<sub>2</sub>), 3.16 (t, *J* = 6.9 Hz, 2H, CH<sub>2</sub>), 4.04 (t, *J* = 7.6 Hz, 2H, CH<sub>2</sub>), 7.03-7.07 (m, 1H, CH), 7.10-7.14 (m, 1H, CH), 7.23 (d, *J* = 8.6 Hz, 1H, CH), 7.52 (d, *J* = 7.7 Hz, 1H, CH).

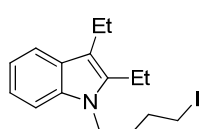

**2d<sup>1</sup>**: Yellow oil, isolated yield 82% (87 mg). <sup>1</sup>H NMR (500 MHz, CDCl<sub>3</sub>, Me<sub>4</sub>Si): δ 1.20-1.25 (m, 6H, CH<sub>3</sub>), 1.87-1.89 (m, 4H, CH<sub>2</sub>), 2.71-2.79 (m, 4H, CH<sub>2</sub>), 3.17 (t, *J* = 6.5 Hz, 2H, CH<sub>2</sub>), 4.08 (t, *J* = 7.0 Hz, 2H, CH<sub>2</sub>), 7.04-7.08 (m, 1H, CH), 7.12-7.15 (m, 1H, CH), 7.25 (s, 1H, CH), 7.54 (d, *J* = 7.5 Hz, 1H, CH).

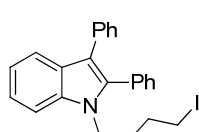

**2e**: Yellow oil, isolated yield 66% (89 mg). <sup>1</sup>H NMR (400 MHz, CDCl<sub>3</sub>, Me<sub>4</sub>Si): δ 1.60-1.67 (m, 2H, CH<sub>2</sub>), 1.75-1.82 (m, 2H, CH<sub>2</sub>), 2.96 (t, *J* = 6.8 Hz, 2H, CH<sub>2</sub>), 4.12 (t, *J* = 7.2 Hz, 2H, CH<sub>2</sub>), 7.14-7.20 (m, 2H, CH), 7.23-7.34 (m, 7H, CH), 7.37-7.43 (m, 4H, CH), 7.80 (d, *J* = 7.9 Hz, 1H, CH); <sup>13</sup>C NMR (100 MHz, CDCl<sub>3</sub>): δ 5.6 (CH<sub>2</sub>), 30.6 (CH<sub>2</sub>), 30.7 (CH<sub>2</sub>), 42.6 (CH<sub>2</sub>), 109.8 (CH), 115.6 (quat. C), 119.9 (CH), 120.2 (CH), 122.2 (CH), 125.5 (CH), 127.3 (quat. C), 128.1 (2 CH), 128.2 (CH), 128.5 (2 CH), 129.8 (2 CH), 131.2 (2 CH), 132.1 (quat. C), 135.0 (quat. C), 136.3 (quat. C), 137.4 (quat. C). HRMS calcd. for C<sub>24</sub>H<sub>23</sub>IN [M+H]<sup>+</sup>: 452.0870, found 452.0876.

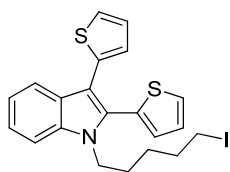

**2f**: Yellow oil, isolated yield 75% (107 mg).  $^1\text{H}$  NMR (400 MHz,  $\text{CDCl}_3$ ,  $\text{Me}_4\text{Si}$ ):  $\delta$  1.32-1.40 (m, 2H,  $\text{CH}_2$ ), 1.70-1.80 (m, 4H,  $\text{CH}_2$ ), 3.10 (t,  $J = 6.9$  Hz, 2H,  $\text{CH}_2$ ), 4.10 (t,  $J = 7.6$  Hz, 2H,  $\text{CH}_2$ ), 6.99-7.03 (m, 2H, CH), 7.15-7.23 (m, 4H, CH), 7.29-7.33 (m, 1H, CH), 7.38 (d,  $J = 8.2$  Hz, 1H, CH), 7.52-7.54 (m, 1H, CH), 7.93 (d,  $J = 8.0$  Hz, 1H, CH).

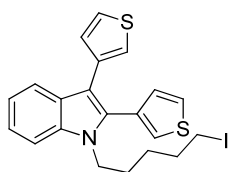

**2g**: Yellow oil, isolated yield 62% (89 mg).  $^1\text{H}$  NMR (400 MHz,  $\text{C}_6\text{D}_6$ ,  $\text{Me}_4\text{Si}$ ):  $\delta$  0.68-0.76 (m, 2H,  $\text{CH}_2$ ), 1.04-1.11 (m, 2H,  $\text{CH}_2$ ), 1.12-1.19 (m, 2H,  $\text{CH}_2$ ), 2.43 (t,  $J = 7.1$  Hz, 2H,  $\text{CH}_2$ ), 3.58 (t,  $J = 7.4$  Hz, 2H,  $\text{CH}_2$ ), 6.75-6.77 (m, 1H, CH), 6.84-6.86 (m, 2H, CH), 6.90-6.92 (m, 1H, CH), 6.99-7.00 (m, 1H, CH), 7.09-7.11 (m, 1H, CH), 7.17 (s, 1H, CH), 7.23-7.34 (m, 2H, CH), 7.95 (d,  $J = 7.7$  Hz, 1H, CH);  $^{13}\text{C}$  NMR (100 MHz,  $\text{CDCl}_3$ ):  $\delta$  6.3 ( $\text{CH}_2$ ), 27.7 ( $\text{CH}_2$ ), 28.9 ( $\text{CH}_2$ ), 32.7 ( $\text{CH}_2$ ), 43.6 ( $\text{CH}_2$ ), 109.7 (CH), 111.2 (quat. C), 119.9 (CH), 120.2 (CH), 120.8 (CH), 122.2 (CH), 124.5 (CH), 126.0 (CH), 126.1 (CH), 126.9 (quat. C), 128.5 (CH), 129.5 (CH), 132.2 (quat. C), 132.3 (quat. C), 135.2 (quat. C), 136.2 (quat. C). HRMS calcd. for  $\text{C}_{21}\text{H}_{21}\text{INS}_2$   $[\text{M}+\text{H}]^+$ : 478.0155, found 478.0152.

**Procedure for the preparation of 4**: Under an atmosphere of nitrogen,  $\text{Pd}(\text{-allyl})(\text{Cp})$  (5 mol %),  $\text{PPh}_3$  (10 mol %) and  $\text{LiO}^t\text{Bu}$  (0.36 mmol), were added to 2 mL cyclohexane. After this reaction mixture was stirred at room temperature for 5 min, **3** (0.3 mmol) and 3-hexyne (0.36 mmol) were added and the reaction mixture was stirred at 130 °C for 12 h. The reaction mixture was quenched with water and extracted with  $\text{Et}_2\text{O}$ . The combined organic layer was washed with brine and dried over  $\text{MgSO}_4$ . The solvent was then evaporated in vacuo and the residue was purified by silica gel column chromatography with petroleum ether and ethyl acetate as eluent to afford the final product **4**.

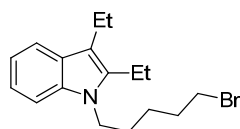

**4**: Yellow oil, isolated yield 32% (31 mg).  $^1\text{H}$  NMR (400 MHz,  $\text{C}_6\text{D}_6$ ):  $\delta$  0.91-0.99 (m, 2H,  $\text{CH}_2$ ), 1.03 (t,  $J = 7.6$  Hz, 3H,  $\text{CH}_3$ ), 1.20-1.29 (m, 7H,  $\text{CH}_3+2\text{CH}_2$ ), 2.48 (q,  $J = 7.5$  Hz, 2H,  $\text{CH}_2$ ), 2.70-2.78 (m, 4H,  $\text{CH}_2$ ), 3.53 (t,  $J = 7.5$  Hz, 2H,  $\text{CH}_2$ ), 7.09-7.12 (m, 1H, CH), 7.21-7.29 (m, 2H, CH), 7.65-7.67 (m, 1H, CH);  $^{13}\text{C}$  NMR (100 MHz,  $\text{C}_6\text{D}_6$ ):  $\delta$  15.5 ( $\text{CH}_3$ ), 16.5 ( $\text{CH}_3$ ), 17.8 ( $\text{CH}_2$ ), 18.1 ( $\text{CH}_2$ ), 25.7 ( $\text{CH}_2$ ), 29.6 ( $\text{CH}_2$ ), 32.4 ( $\text{CH}_2$ ), 33.2 ( $\text{CH}_2$ ), 42.8

(CH<sub>2</sub>), 109.4 (CH), 113.3 (quat. C), 118.9 (CH), 119.2 (CH), 121.0 (CH), 128.6 (quat. C), 136.6 (quat. C), 137.0 (quat. C). HRMS calcd. for C<sub>17</sub>H<sub>25</sub>BrN [M+H]<sup>+</sup>: 322.1165, found 322.1174.

## 2) Reference:

- Hao, W.; Wei, J.; Zhang, W.-X.; Xi, Z. *Angew. Chem. Int. Ed.* **2014**, *53*, 14533.

## 3) Scanned <sup>1</sup>H NMR and <sup>13</sup>C NMR Spectra of All Compounds

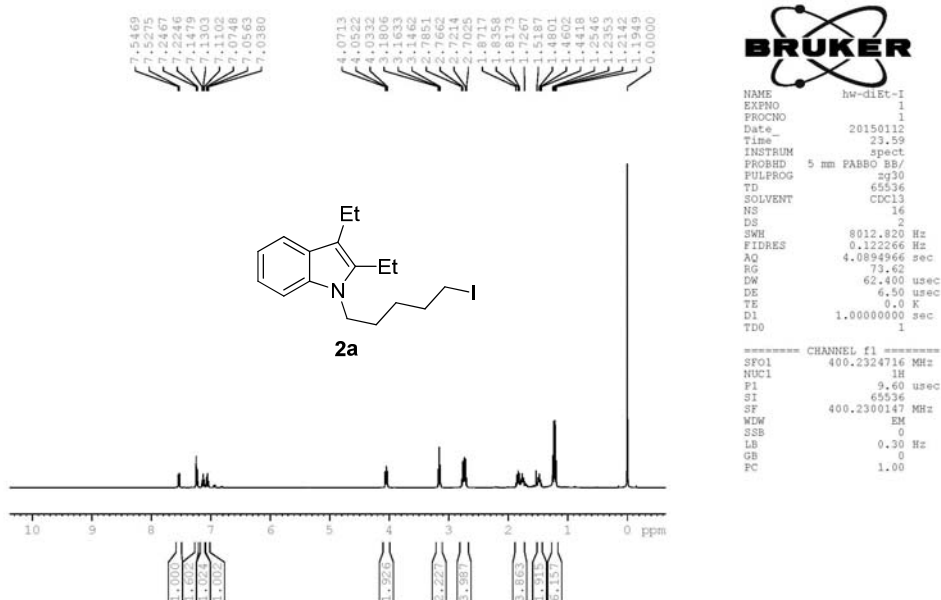

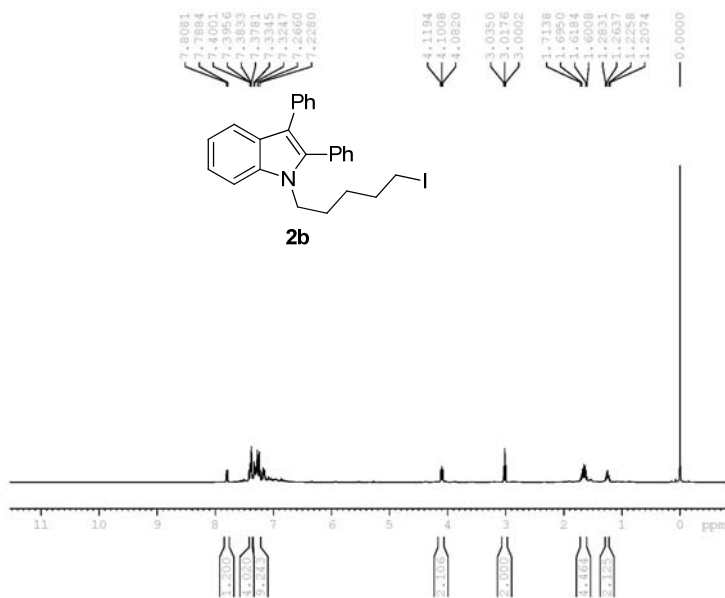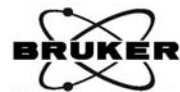

```

NAME          hw-d1Ph-I
EXPNO         1
PROCNO        1
Date_         20150113
Time_         0.36
INSTRUM       spect
PROBHD        5 mm F4BBO BB/
PULPROG       zg30
TD            65536
SOLVENT       CDCl3
NS            16
DS            2
SWH           8012.820 Hz
FIDRES        0.122266 Hz
AQ            4.089466 sec
RG            57.82
DW            62.400 usec
DE            6.50 usec
TE            0.0 K
D1            1.00000000 sec
TDO           1

===== CHANNEL f1 =====
SFO1          400.2324716 MHz
NUC1          1H
P1            9.60 usec
SI            65536
SF            400.2300172 MHz
WDW           EM
SSB           0
LB            0.30 Hz
GB            0
PC            1.00

```

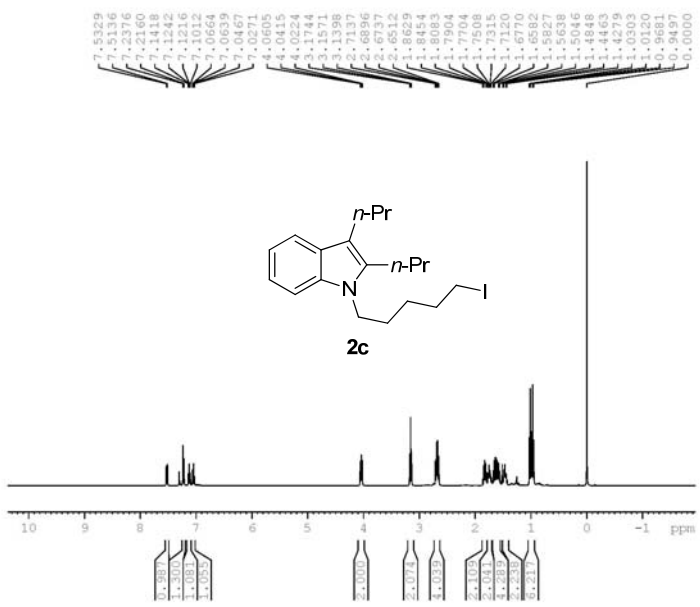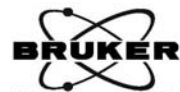

```

NAME          hw-2138
EXPNO         1
PROCNO        1
Date_         20150113
Time_         22.09
INSTRUM       spect
PROBHD        5 mm F4BBO BB/
PULPROG       zg30
TD            65536
SOLVENT       CDCl3
NS            16
DS            2
SWH           8012.820 Hz
FIDRES        0.122266 Hz
AQ            4.0894966 sec
RG            31.45
DW            62.400 usec
DE            6.50 usec
TE            0.0 K
D1            1.00000000 sec
TDO           1
  
```

```

===== CHANNEL f1 =====
SFO1          400.2324716 MHz
NUC1           1H
P1             9.60 usec
SI            65536
SF            400.2300184 MHz
WDW            EM
SSB            0
LB            0.30 Hz
GB            0
PC            1.00
  
```

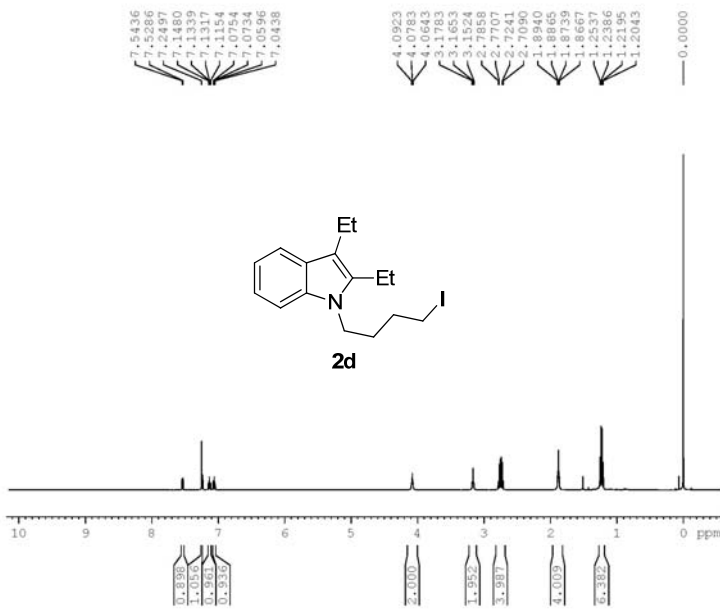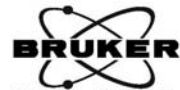

```

NAME      NMR15010471
EXPNO    1
PROCNO   1
Date_    20150114
Time     14.42
INSTRUM  spect
PROBHD   5 mm F4BBO BB-
PULPROG  zg30
TD       65536
SOLVENT  CDC13
NS       32
DS       0
SWH      6087.662 Hz
FIDRES   0.092890 Hz
AQ       5.3827400 sec
RG       122.2
DW       82.130 usec
DE       6.50 usec
TE       303.1 K
D1       1.00000000 sec
TDO      1

===== CHANNEL f1 =====
SFO1     500.1320485 MHz
NUC1     1H
P1       11.23 usec
SI       65536
SF       500.1300168 MHz
MDW      EM
SSB      0
LB       0.10 Hz
GB       0
PC       1.00

```



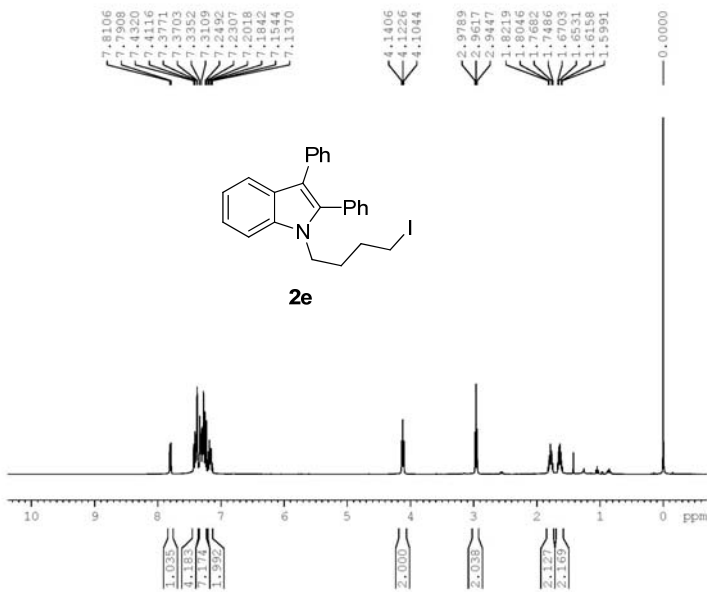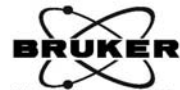

```

NAME      hw-2155
EXPNO     1
PROCNO    1
Date_     20150127
Time      15.30
INSTRUM   spect
PROBHD    5 mm FADUL13C
PULPROG   zg30
TD         65536
SOLVENT   CDCl3
NS         16
DS         2
SWH        8223.685 Hz
FIDRES     0.125483 Hz
AQ         3.9846387 sec
RG         80.6
DW         60.800 usec
DE         6.50 usec
TE         294.8 K
D1         1.00000000 sec
TDO        1

===== CHANNEL f1 =====
NUC1      1H
P1        12.00 usec
SI        65536
SF        400.1300214 MHz
WDW       EM
SSB       0
LB        0.30 Hz
GB        0
PC        1.00
  
```

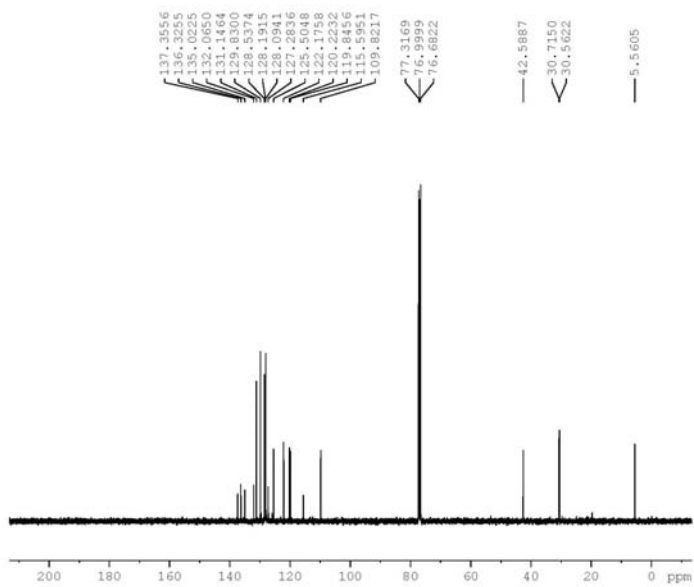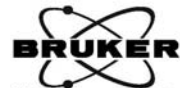

```

NAME      hw-1749
EXPNO     2
PROCNO    1
Date_     20140523
Time      21.44
INSTRUM   spect
PROBHD    5 mm FAPBO BB/
PULPROG   zgpg30
TD         65536
SOLVENT   CDCl3
NS         256
DS         4
SWH        24038.461 Hz
FIDRES     0.366798 Hz
AQ         1.3631988 sec
RG         202.54
DW         20.800 usec
DE         6.50 usec
TE         303.0 K
D1         2.00000000 sec
D11        0.03000000 sec
TDO        1

===== CHANNEL f1 =====
SF01      100.6279769 MHz
NUC1      13C
P1        9.20 usec
SI        32768
SF        100.6279170 MHz
WDW       EM
SSB       0
LB        1.00 Hz
GB        0
PC        1.40
  
```



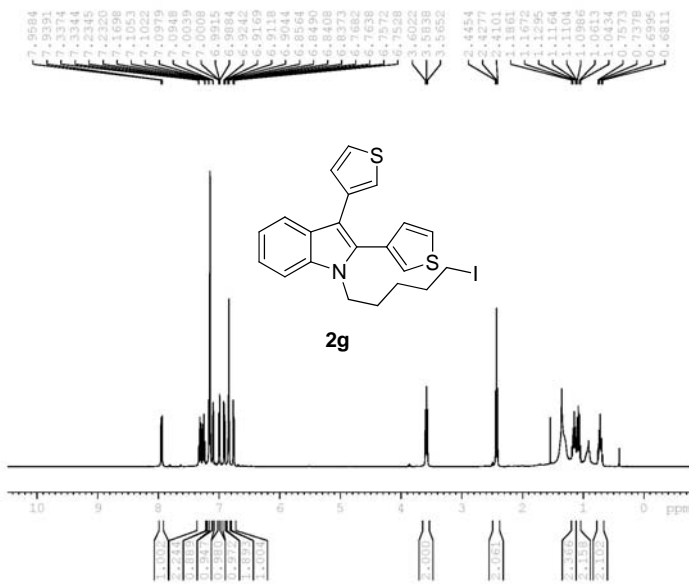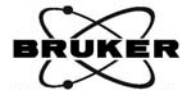

```

NAME      hw-1599b
EXPNO     1
PROCNO    1
Date_     20140323
Time      20.09
INSTRUM   spect
PROBHD    5 mm FAPBO BB-
PULPROG   zg30
TD         65536
SOLVENT   CDCl3
NS         16
DS         2
SWH        8223.685 Hz
FIDRES     0.125483 Hz
AQ         3.9846387 sec
RG         71.8
DW         60.800 usec
DE         6.50 usec
TE         297.0 K
D1         1.00000000 sec
TDO        1

===== CHANNEL f1 =====
NUC1      1H
P1         25.00 usec
SI         65536
SF         400.1300006 MHz
WDW        EM
SSB        0
LB         0.30 Hz
GB         0
PC         1.00
  
```

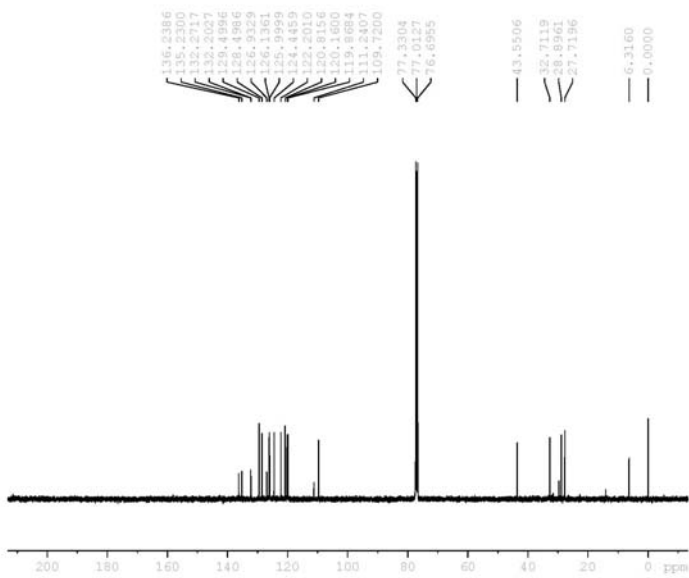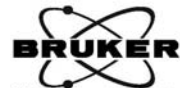

```

NAME      hw-1599-2
EXPNO     2
PROCNO    1
Date_     20140322
Time      6.56
INSTRUM   spect
PROBHD    5 mm FAPBO BB-
PULPROG   zpgg30
TD         65536
SOLVENT   CDCl3
NS         720
DS         4
SWH        24038.461 Hz
FIDRES     0.366798 Hz
AQ         1.3631988 sec
RG         203
DW         20.800 usec
DE         6.50 usec
TE         298.4 K
D1         2.00000000 sec
D11        0.03000000 sec
TDO        1

===== CHANNEL f1 =====
NUC1      13C
P1         12.00 usec
SI         32768
SF         100.6127707 MHz
WDW        EM
SSB        0
LB         1.00 Hz
GB         0
PC         1.40
  
```

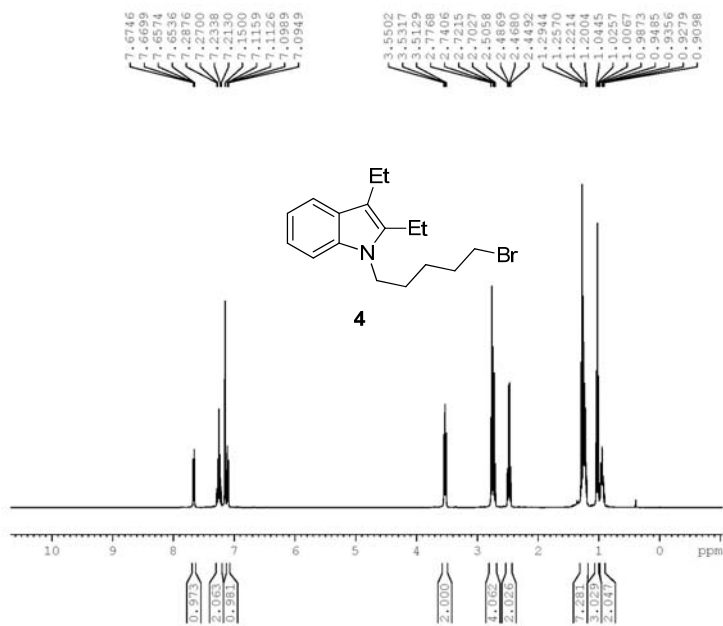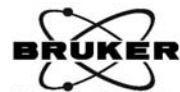

```

NAME hw-971 with Br
EXPNO 1
PROCNO 1
Date_ 20130318
Time_ 14.39
INSTRUM spect
PROBHD 5 mm FAPBO BB-
PULPROG zg30
TD 65536
SOLVENT C6D6
NS 16
DS 2
SWH 8223.685 Hz
FIDRES 0.125483 Hz
AQ 3.9846387 sec
RG 80.6
DW 60.800 usec
DE 6.50 usec
TE 296.4 K
D1 1.0000000 sec
TDO 1

===== CHANNEL f1 =====
NUC1 1H
P1 14.50 usec
SI 65536
SF 400.1300004 MHz
WDW EM
SSB 0
LB 0.30 Hz
GB 0
PC 1.00
  
```

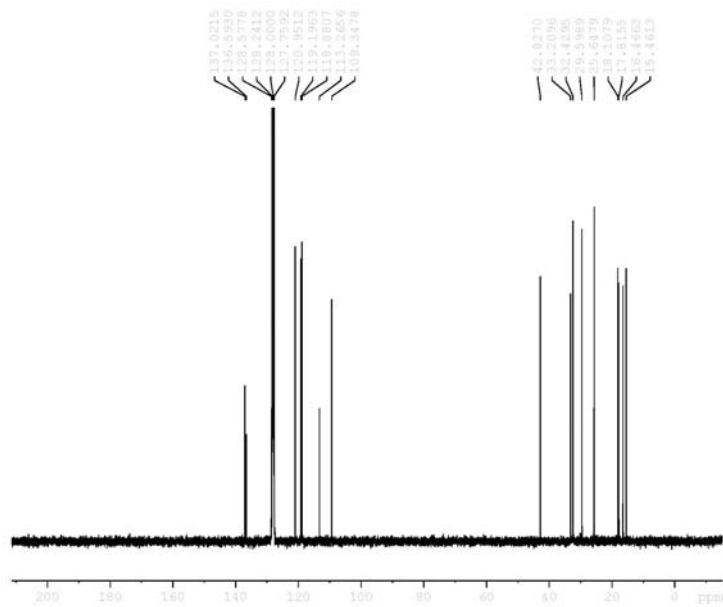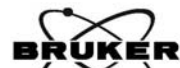

```

NAME hw-971 with Br
EXPNO 2
PROCNO 1
Date_ 20130318
Time_ 15.07
INSTRUM spect
PROBHD 5 mm FAPBO BB-
PULPROG zgpg30
TD 65536
SOLVENT C6D6
NS 480
DS 4
SWH 24038.461 Hz
FIDRES 0.366798 Hz
AQ 1.3631988 sec
RG 203
DW 20.800 usec
DE 6.50 usec
TE 297.7 K
D1 2.0000000 sec
D11 0.0300000 sec
TDO 1

===== CHANNEL f1 =====
NUC1 13C
P1 9.80 usec
SI 32768
SF 100.6127372 MHz
WDW EM
SSB 0
LB 1.00 Hz
GB 0
PC 1.40
  
```
